# Supplementary material for: Requirement of Xk and Vps13a for the P2X7-mediated phospholipid scrambling and cell lysis in mouse T cells
Source: PubMed Central journal article supplement — Proc Natl Acad Sci U S A. 2022 Feb 9;119(7):e2119286119. doi: 10.1073/pnas.2119286119 (PMC8851519; doi:10.1073/pnas.2119286119), 2022-02-09
Supplement: pnas.2119286119.sapp.pdf [file pnas.2119286119.sapp.pdf]

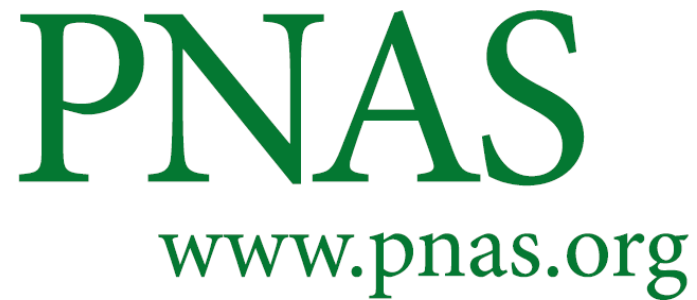

## **Supplementary Information for**

Requirement of Xk and Vps13a for the P2X7-mediated phospholipid scrambling and cell lysis in mouse T cells

Yuta Ryoden, Katsumori Segawa, and Shigekazu Nagata

Correspondence to Shigekazu Nagata  
Email: snagata@ifrec.osaka-u.ac.jp

### **This PDF file includes:**

Figures S1 to S5 (not allowed for Brief Reports)  
SI References

## Supplementary Figures

Initiation (Met)

H2a11a GACATCATGGCCAAGAAAATGCAAAGGCGAAGAAGACAGAAAAGAACCCGCTCCCAGAGAGGTGAGCTTCCTTTCA  
H2a11b GACATCATGGCCAAGAAAATGCAAAGGCGAAGAAGACAGAAAAGAACCCGCTCCCAGAGAGGTTGAGCTTCCTCTTA  
H2a11c GACATCATGGCCAAGAAAATGCAAAGGCGAAGAAGACAGAAAAGAACCCGCTCCCAGAGAGGTTGAGCTTCCTTTCA  
H2a11d GACATCATGGCCAAGAAAATGCAAAGGCGAAGAAGACAGAAAAGAACCCGCTCCCAGAGAGGTTGAGCTTCCTTTCA  
H2a11e GACATCATGGCCAAGAAAATGCAAAGGCGAAGAAGACAGAAAAGAACCCGCTCCCAGAGAGGTTGAGCTTCCTCTTA  
H2a11f GACATCATGGCCAAGAAAATGCAAAGGCGAAGAAGACAGAAAAGAACCCGCTCCCAGAGAGGTTGAGCTTCCTTTCA  
H2a11g GACATCATGGCCAAGAAAATGCAAAGGCGAAGAAGACAGAAAAGAACCCGCTCCCAGAGAGGTTGAGCTTCCTTTCA  
H2a11h GACATCATGGCCAAGAAAATGCAAAGGCGAAGAAGACAGAAAAGAACCCGCTCCCAGAGAGGTTGAGCTTCCTTTCA  
H2a11i GACATCATGGCCAAGAAAATGCAAAGGCGAAGAAGACAGAAAAGAACCCGCTCCCAGAGAGGTTGAGCTTCCTTTCA  
H2a11k GACATCATGGCCAAGAAAATGCAAAGGCGAAGAAGACAGAAAAGAACCCGCTCCCAGAGAGGTTGAGCTTCCTCTTA  
H2a11m GACATCATGGCCAAGAAAATGCAAAGGCGAAGAAGACAGAAAAGAACCCGCTCCCAGAGAGGTTGAGCTTCCTCTTA

H2a11a GCCTTGTAGATCGTTTCTACGAGAGGAATTCATTCAGTCGCCTGAGCTCTTCGCACTTTTCATTCTCCACAGG  
H2a11b GCCTTGTAGATCGTTTCTACGAGAGGAATTCATTCAGTCGCCTGAGCTCTTCGCACTTTTCATTCTCCACAGG  
H2a11c GCCTTGTAGATCGTTTCTACGAGAGGAATTCATTCAGTCGCCTGAGCTCTTCGCACTTTTCATTCTCCACAGG  
H2a11d GCCTTGTAGATCGTTTCTACGAGAGGAATTCATTCAGTCGCCTGAGCTCTTCGCACTTTTCATTCTCCACAGG  
H2a11e GCCTTGTAGATCGTTTCTACGAGAGGAATTCATTCAGTCGCCTGAGCTCTTCGCACTTTTCATTCTCCACAGG  
H2a11f GCCTTGTAGATCGTTTCTACGAGAGGAATTCATTCAGTCGCCTGAGCTCTTCGCACTTTTCATTCTCCACAGG  
H2a11g GCCTTGTAGATCGTTTCTACGAGAGGAATTCATTCAGTCGCCTGAGCTCTTCGCACTTTTCATTCTCCACAGG  
H2a11h GCCTTGTAGATCGTTTCTACGAGAGGAATTCATTCAGTCGCCTGAGCTCTTCGCACTTTTCATTCTCCACAGG  
H2a11i GCCTTGTAGATCGTTTCTACGAGAGGAATTCATTCAGTCGCCTGAGCTCTTCGCACTTTTCATTCTCCACAGG  
H2a11k GCCTTGTAGATCGTTTCTACGAGAGGAATTCATTCAGTCGCCTGAGCTCTTCGCACTTTTCATTCTCCACAGG  
H2a11m GCCTTGTAGATCGTTTCTACGAGAGGAATTCATTCAGTCGCCTGAGCTCTTCGCACTTTTCATTCTCCACAGG

H2a11a TGTGCTCGAGTACTTAAACATCGAACATCCTCGAAGTGGCTGGTGGGTTGGCCAGACCCTGGCAGGAAGCGCATA  
H2a11b TGTGCTCGAGTACTTAAACATCGAACATCCTCGAAGTGGCTGGTGGGTTGGCCAGACCCTGGCAGGAAGCGCATA  
H2a11c TGTGCTCGAGTACTTAAACATCGAACATCCTCGAAGTGGCTGGTGGGTTGGCCAGACCCTGGCAGGAAGCGCATA  
H2a11d TGTGCTCGAGTACTTAAACATCGAACATCCTCGAAGTGGCTGGTGGGTTGGCCAGACCCTGGCAGGAAGCGCATA  
H2a11e TGTGCTCGAGTACTTAAACATCGAACATCCTCGAAGTGGCTGGTGGGTTGGCCAGACCCTGGCAGGAAGCGCATA  
H2a11f TGTGCTCGAGTACTTAAACATCGAACATCCTCGAAGTGGCTGGTGGGTTGGCCAGACCCTGGCAGGAAGCGCATA  
H2a11g TGTGCTCGAGTACTTAAACATCGAACATCCTCGAAGTGGCTGGTGGGTTGGCCAGACCCTGGCAGGAAGCGCATA  
H2a11h TGTGCTCGAGTACTTAAACATCGAACATCCTCGAAGTGGCTGGTGGGTTGGCCAGACCCTGGCAGGAAGCGCATA  
H2a11i TGTGCTCGAGTACTTAAACATCGAACATCCTCGAAGTGGCTGGTGGGTTGGCCAGACCCTGGCAGGAAGCGCATA  
H2a11k TGTGCTCGAGTACTTAAACATCGAACATCCTCGAAGTGGCTGGTGGGTTGGCCAGACCCTGGCAGGAAGCGCATA  
H2a11m TGTGCTCGAGTACTTAAACATCGAACATCCTCGAAGTGGCTGGTGGGTTGGCCAGACCCTGGCAGGAAGCGCATA

H2a11a GCTCCAGAGGATGTACGCTCTGGTGGTACAGAACAACGAACAGCTCCGCCAACTCTTCAAACAGGTTGGCAGCATCAG  
H2a11b GCTCCAGAGGATGTACATCTGGTGGTACAGAACAACGAACAGCTCCGCCAACTCTTCAAACAGGTTGGCAGCATCAG  
H2a11c GCTCCAGAGGATGTACGCTCTGGTGGTACAGAACAACGAACAGCTCCGCCAACTCTTCAAACAGGTTGGCAGCATCAG  
H2a11d GCTCCAGAGGATGTACGCTCTGGTGGTACAGAACAACGAACAGCTCCGCCAACTCTTCAAACAGGTTGGCAGCATCAG  
H2a11e GCTCCAGAGGATGTACGCTCTGGTGGTACAGAACAACGAACAGCTCCGCCAACTCTTCAAACAGGTTGGCAGCATCAG  
H2a11f GCTCCAGAGGATGTACGCTCTGGTGGTACAGAACAACGAACAGCTCCGCCAACTCTTCAAACAGGTTGGCAGCATCAG  
H2a11g GCTCCAGAGGATGTACGCTCTGGTGGTACAGAACAACGAACAGCTCCGCCAACTCTTCAAACAGGTTGGCAGCATCAG  
H2a11h GCTCCAGAGGATGTACGCTCTGGTGGTACAGAACAACGAACAGCTCCGCCAACTCTTCAAACAGGTTGGCAGCATCAG  
H2a11i GCTCCAGAGGATGTACGCTCTGGTGGTACAGAACAACGAACAGCTCCGCCAACTCTTCAAACAGGTTGGCAGCATCAG  
H2a11k GCTCCAGAGGATGTACGCTCTGGTGGTACAGAACAACGAACAGCTCCGCCAACTCTTCAAACAGGTTGGCAGCATCAG  
H2a11m ACTCCAGAGGATGTACGCTCTGGTGGTACAGAACAACGAACAGCTCCGCCAACTCTTCAAACAGGTTGGCAGCATCAG

H2a11a TGAATGAGGATGACAACTGATGATGC  
H2a11b TGAATGAGGATGACAACTGATGATGC  
H2a11c TGAATGAGGATGACAACTGATGATGC  
H2a11d TGAATGAGGATGACAACTGATGATGC  
H2a11e TGAATGAGGATGACAACTGATGATGC  
H2a11f TGAATGAGGATGACAACTGATGATGC  
H2a11g TGAATGAGGATGACAACTGATGATGC  
H2a11h TGAATGAGGATGACAACTGATGATGC  
H2a11i TGAATGAGGATGACAACTGATGATGC  
H2a11k TGAATGAGGATGACAACTGATGATGC  
H2a11m TGAATGAGGATGACAACTGATGATGC

Termination

**Fig. S1.** Sequence alignment of *H2a1* variant genes. The nucleotide sequences of eleven mouse *H2a1* variant genes (GenBank NM\_001111037, 001242947, 001242949, 001242950, 001025260, 001242951, 001242952, 001242953, 001242954, 001085537, and 029588) are aligned. The nucleotides conserved in all eleven variants are in red, and those conserved in more than seven variants are in blue. Blue underlines indicate Protospacer sequences, and double underlines protospacer-adjacent motifs (PAM). Initiation (ATG) and termination (TGA) codons are shaded in gray.

### A *Xk*

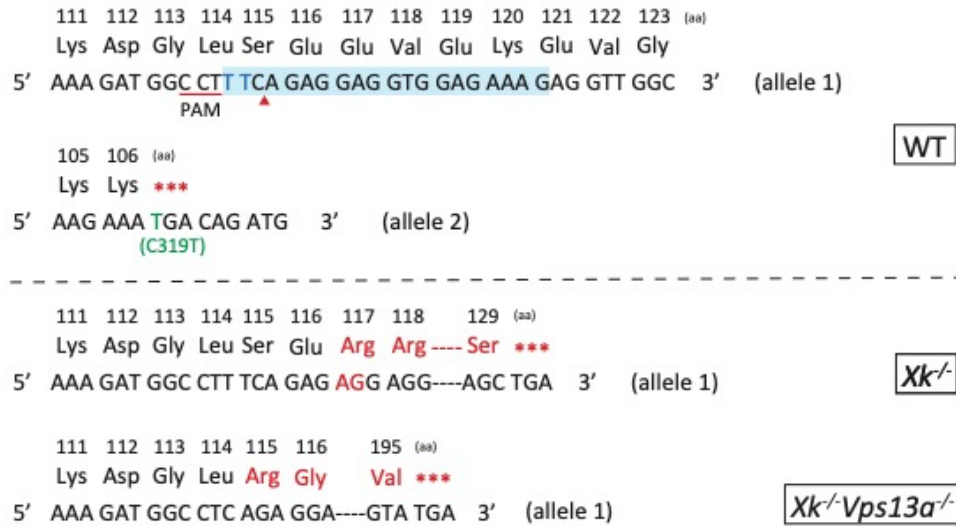

### B *Vps13a*

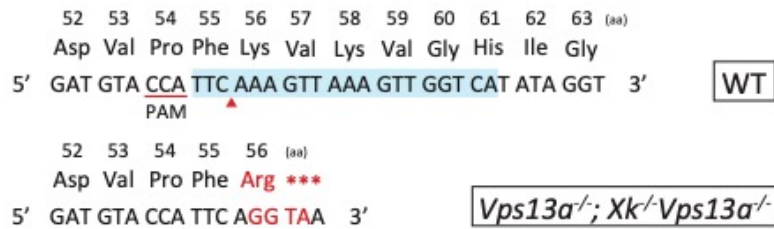

### C *Kel*

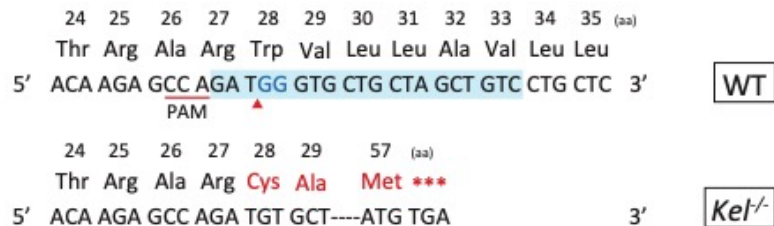

**Fig. S2.** Gene knock-out in mouse WR19L cells by the CRISPR/Cas9 system. (A) The wild-type and mutated allele (allele 1) of the *Xk* gene in *Xk*<sup>-/-</sup> and *Xk*<sup>-/-</sup>*Vps13a*<sup>-/-</sup> DKO-P2X7 are shown. The other allele (allele 2) of the *Xk* gene in WR19L cells had been inactivated by a nonsense mutation, possibly due to the vulnerability of the inactive X chromosome in cancer cells (1). (B) Two alleles of *Vps13a* carried the same 4-bp insertion in *Vps13a*<sup>-/-</sup> and *Xk*<sup>-/-</sup>*Vps13a*<sup>-/-</sup> DKO-P2X7. (C) Two alleles of *Kel* carried the same 2-bp deletion in *Kel*<sup>-/-</sup> DKO-P2X7. Protospacer sequences are highlighted in light blue, protospacer-adjacent motifs (PAM) are underlined in red, and red arrowheads point to cleavage sites. Sequences deleted, inserted, or mutated are shown in blue, red, and green, respectively. The mutated amino acids are shown in red.

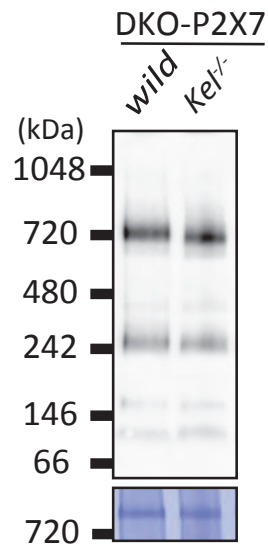

**Fig. S3.** BN-PAGE analysis of Xk in *Ket<sup>-/-</sup>* WR19L cells. The solubilized crude membrane fractions (9.1  $\mu$ g protein) from *DKO-P2X7* and *Ket<sup>-/-</sup>DKO-P2X7* (*Ket<sup>-/-</sup>*) were separated by BN-PAGE and analyzed by Western blotting with anti-Xk. The membrane was stained with CBB and shown in the lower panel.

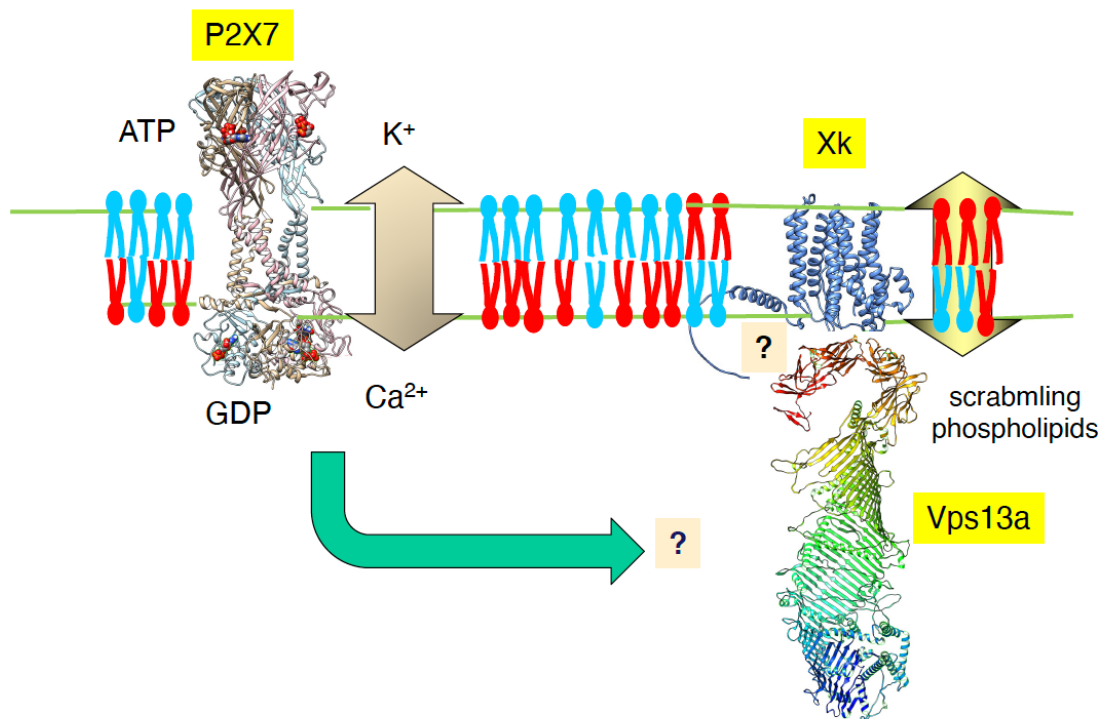

**Fig. S4.** A working hypothesis for the ATP-induced scrambling of phospholipids. In the resting cells, most of PtdCho is localized in the outer leaflet of plasma membranes, while all PtdSer is confined to the inner leaflet. The binding of ATP to the trimeric P2X7 receptor activates its channel activity, including the  $K^+$ -efflux and  $Ca^{2+}$ -influx. The Xk is associated with Vps13a via probably the interaction of the Xk's  $\beta$ -hairpin in the cytoplasmic region and the Vps13's N-terminal region. An unidentified signal from the activated P2X7 receptor would potentiate the Xk-Vps13a complex to scramble phospholipids. The ATP-bound open structure of P2X7 is from Mansoor et al. (2) (PDB; 6U9W). AlphaFold (<https://alphafold.ebi.ac.uk/>) predicted the structures of Xk and Vps13a.

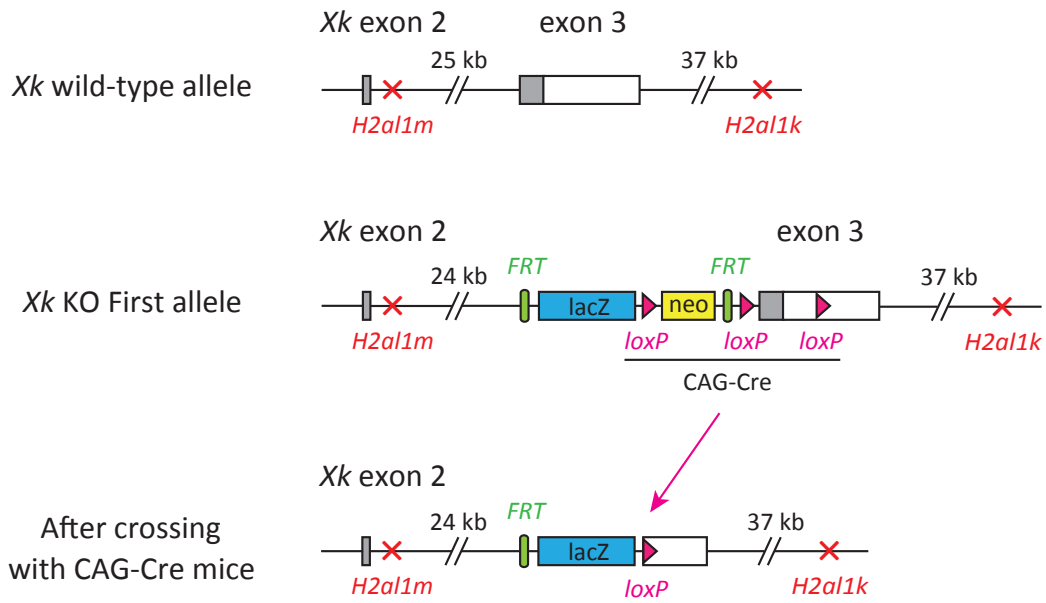

**Fig. S5.** The wild-type and knock-out alleles of mouse *Xk* gene. In the knock-out first (*Xk* KO First) allele, a DNA fragment carrying a splice acceptor site, *FRT*, *lacZ*, *loxP*, *neo*, *FRT*, *loxP*, a part of exon 3, and *loxP*, was inserted in mouse *Xk* gene. Two *H2a11* genes in the flanking region of exon 3 of the *Xk* gene are indicated. Crossing the mice carrying the KO first allele with CAG-Cre mice removes the *neo* and a part of the exon 3 including the coding region (gray).

## SI References

1. N. Jäger *et al.*, Hypermethylation of the inactive X chromosome is a frequent event in cancer. *Cell* **155**, 567-581 (2013).
2. A. E. McCarthy, C. Yoshioka, S. E. Mansoor, Full-length P2X7 structures reveal how palmitoylation prevents channel desensitization. *Cell* **179**, 659-670 (2019).
